# Supplementary material for: AM-6: a microporous one-dimensional ferromagnet
Source: Royal Society of Chemistry journal article supplement (doi:10.1039/b908099f), 2009-01-01

## AM-6: a Microporous One-Dimensional Ferromagnet<sup>S</sup>

Rachel M. Yeates,<sup>a</sup> Morag J. Murdoch,<sup>a</sup> Peter D. Southon,<sup>b</sup> Abbie C. McLaughlin,<sup>a</sup>  
Russell F. Howe,<sup>a\*</sup> Francesca Bonino,<sup>c</sup> Silvia Bordiga,<sup>c</sup> Alessandro Damin.<sup>c</sup>

### Electronic Supplementary Information (ESI)

Fig. S1 X-Ray powder diffraction patterns of AM-6(b) and ETS-10 (a)

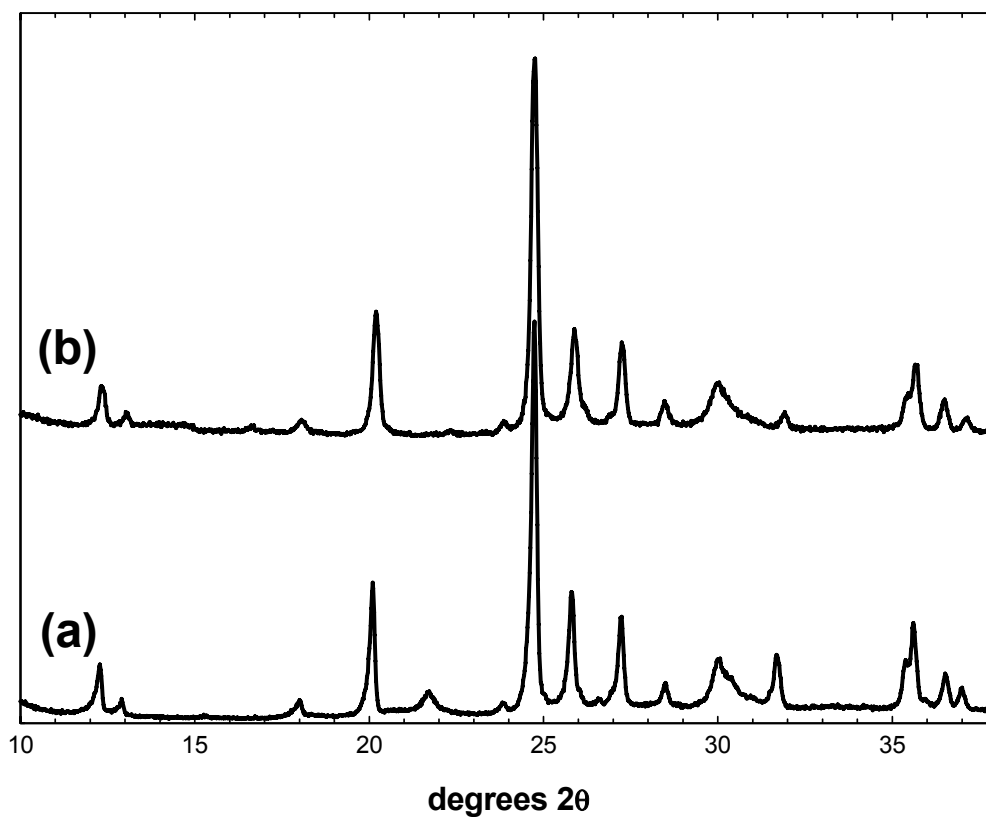

Fig. S2  $^{29}\text{Si}$  NMR spectrum of AM-6 (\* denote spinning side bands)

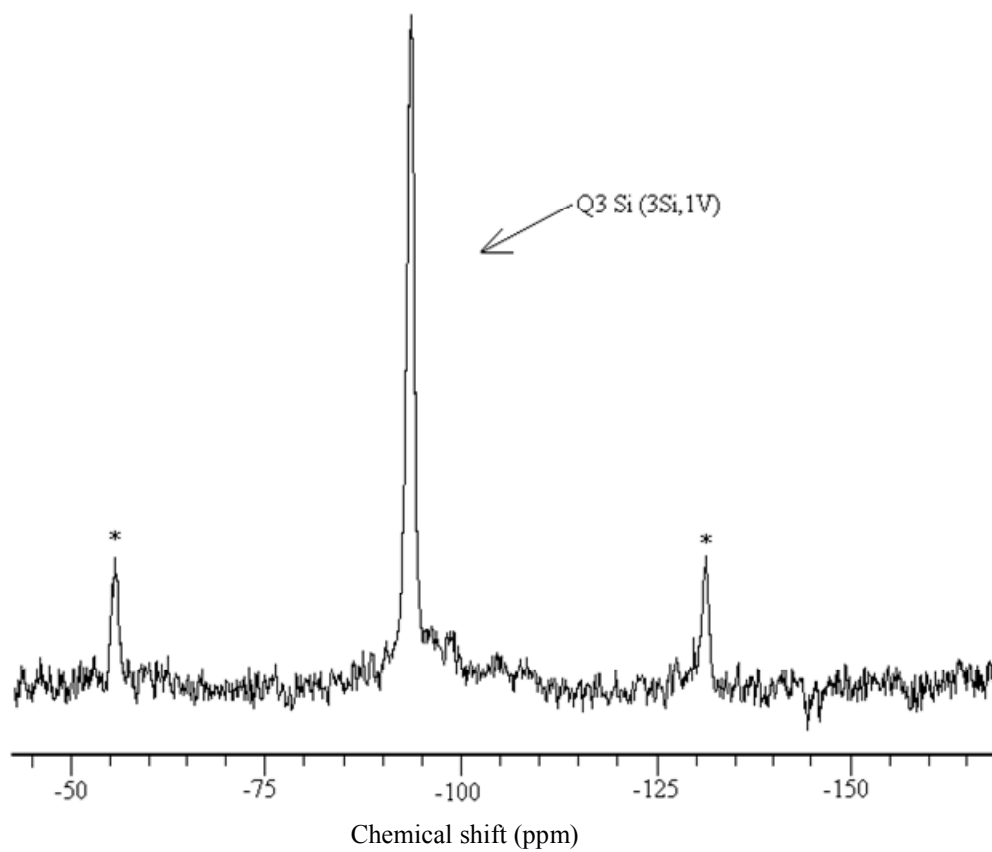

Fig. S3 X-Ray photoelectron spectrum of AM-6 in V 2p region

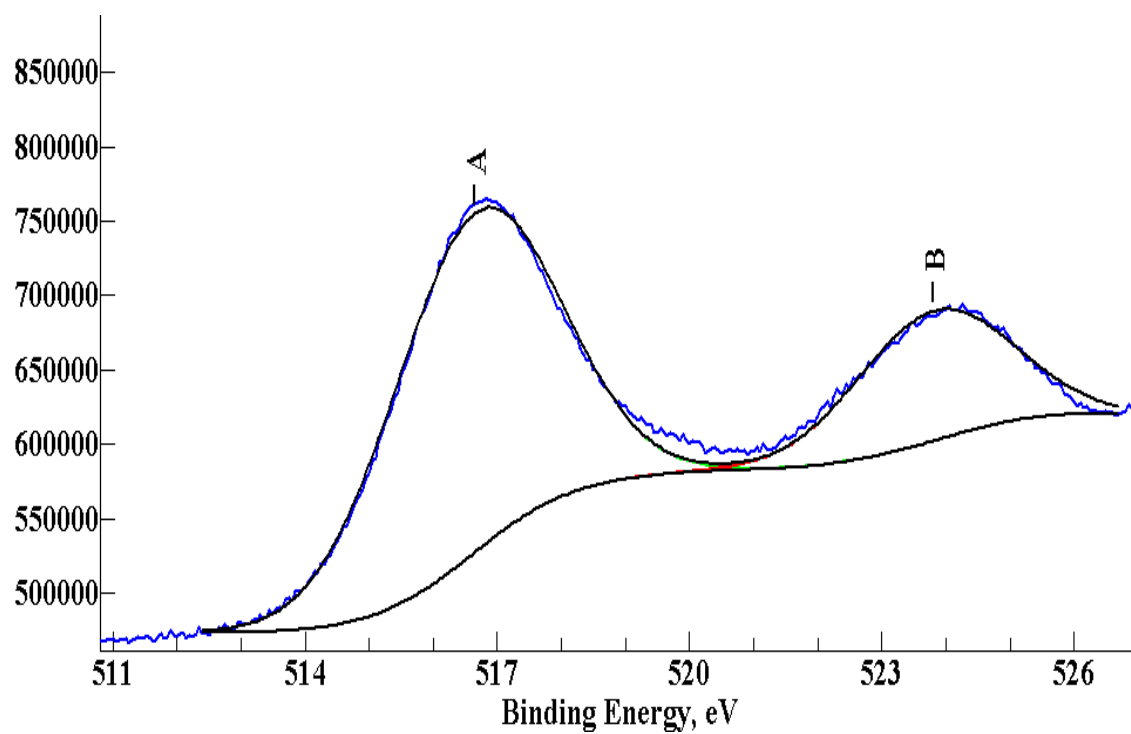

Fig. S4 Observed (solid lines) and calculated (points) V K-edge EXAFS and Fourier transforms for vanadyl acetylacetonate.

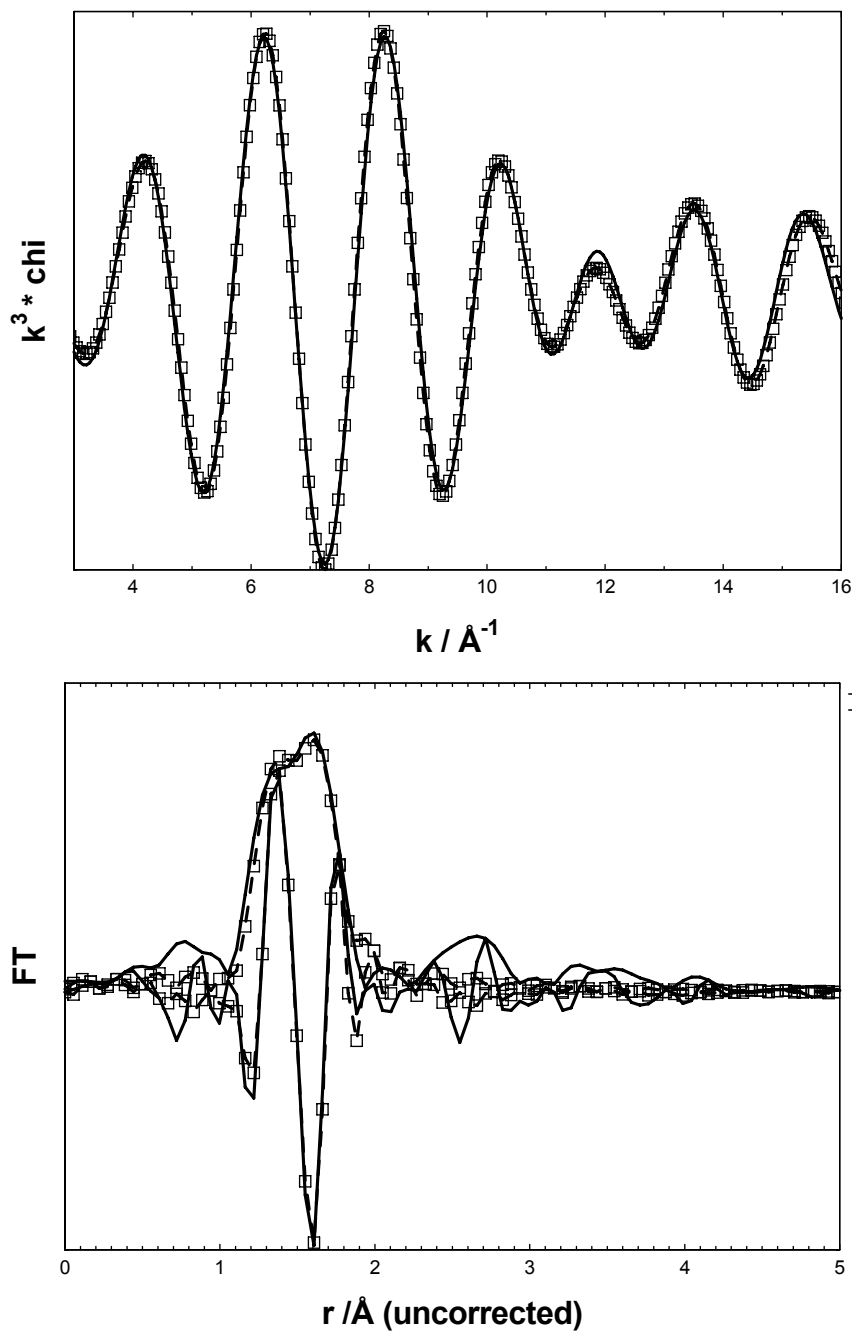

Fig. S5 Variation of magnetisation with magnetic field for AM-6 recorded at 4 K showing no evidence of hysteresis between  $\pm 1$  T.

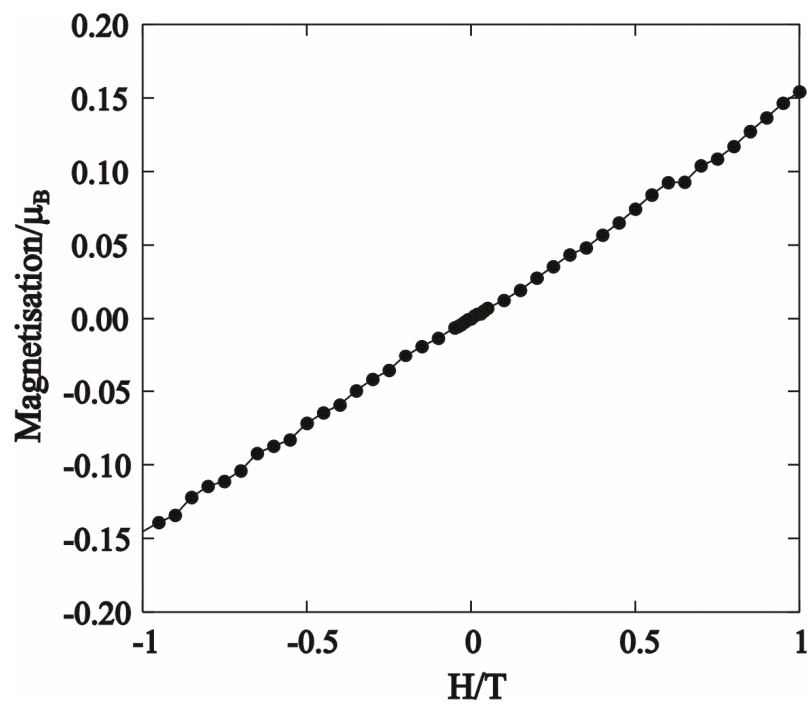

Supplement: b908099f.pdf [file b908099f.pdf]
